# Supplementary material
Source: Springer Nature journal article supplement (https://www.springermedizin.de/resource/supplementary/12885_2011_3099_MOESM1_ESM.pdf/9463636)

# Number of endoscopies per 100,000 inhabitants in The Netherlands 2004-2009

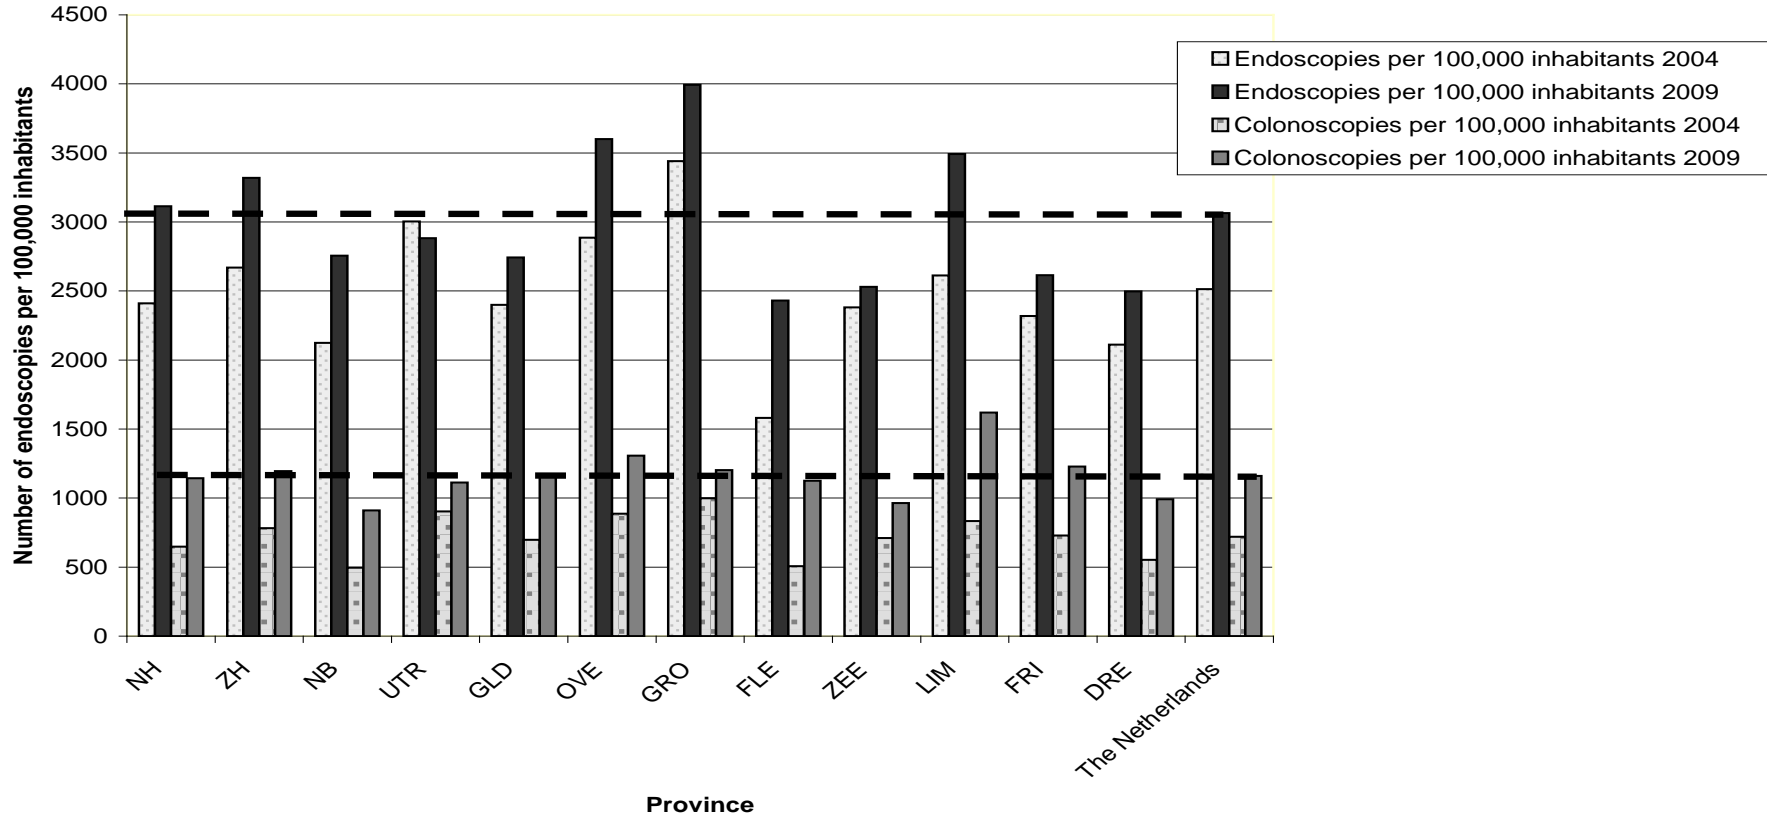

Supplement: MOESM1 [file 9463636]
